# Supplementary material for: Expression and Activity of TRPA1 and TRPV1 in the Intervertebral Disc: Association with Inflammation and Matrix Remodeling
Source: PubMed Central journal article supplement (PMC6480240; doi:10.3390/ijms20071767), 2019-04-10
Supplement: ijms-20-01767-s001.pdf [file ijms-20-01767-s001.pdf]

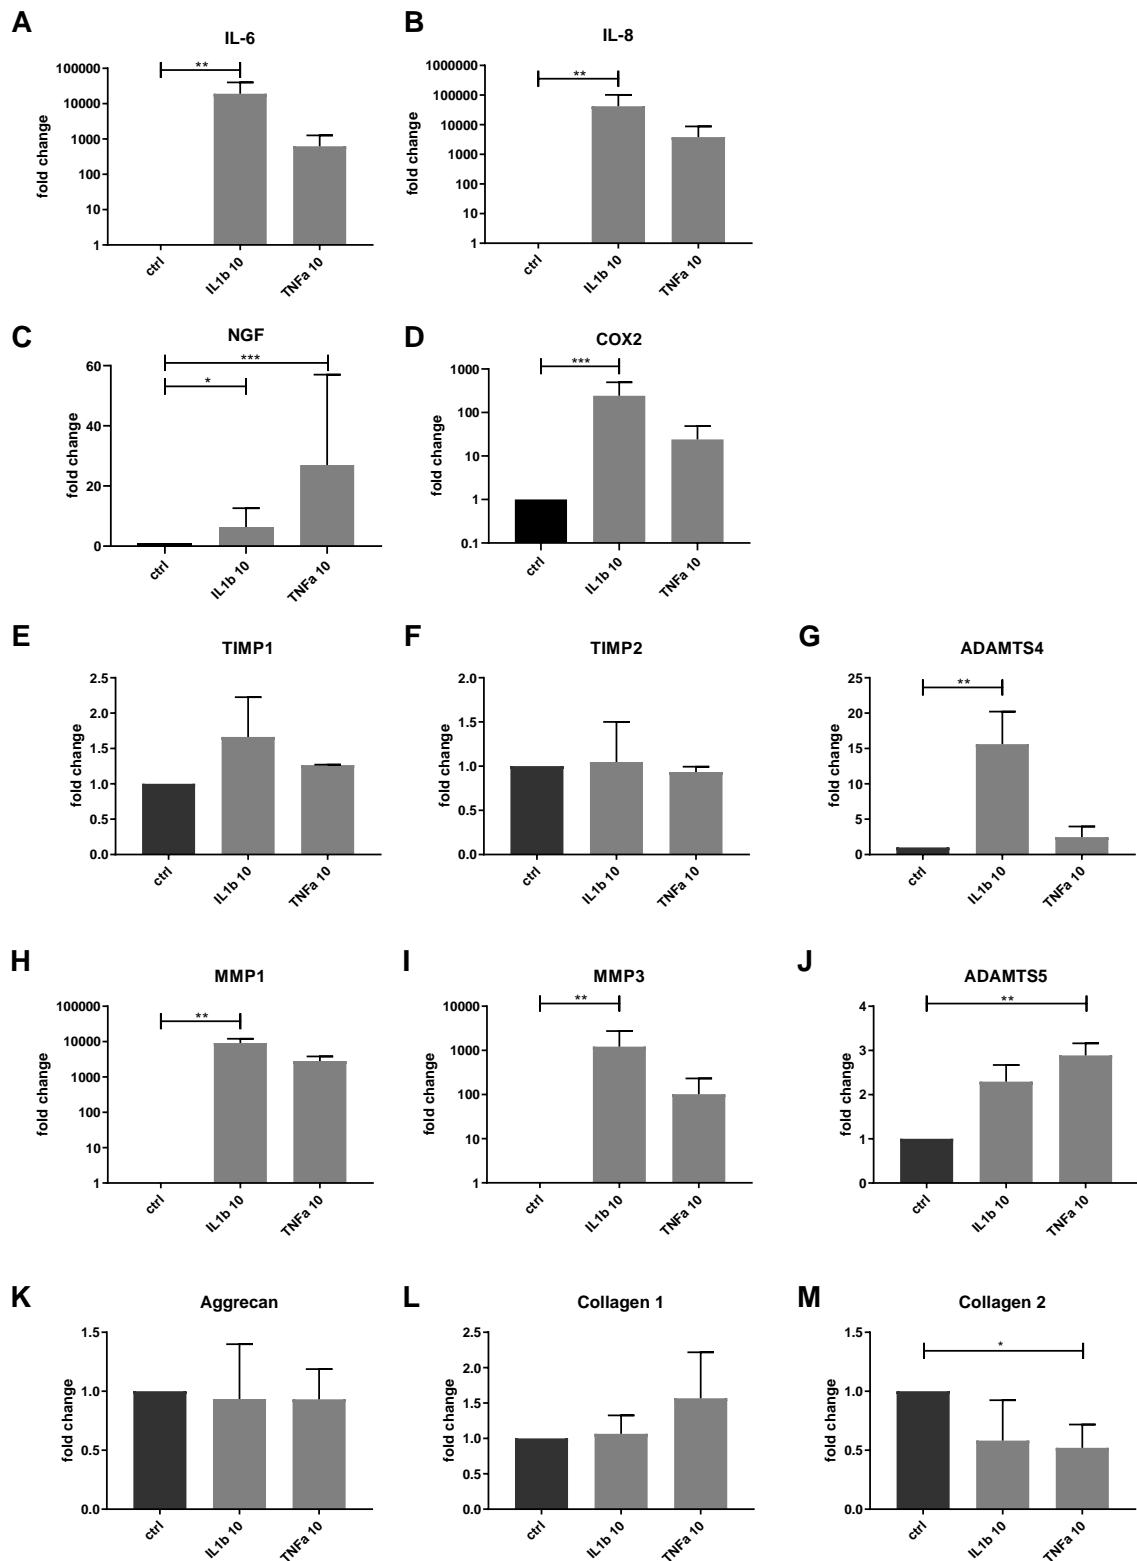

**Supplementary figure S1: Gene expression of inflammation mediators, ECM remodeling enzymes and ECM genes in IVD cells treated with 5 and 10 ng/mL IL-1 $\beta$  or TNF- $\alpha$ .** Gene expression of inflammation mediators (A) IL-6, (B) IL-8, pain mediators (C) NGF, (D) COX-2 and ECM remodeling enzymes, (E) TIMP1 and (F) TIMP2, (G) ADAMTS4, (H) MMP1, (I) MMP3 and (J) ADAMTS5. Gene expression of extracellular matrix genes (K) Aggrecan, (L) Collagen I and (M) Collagen II. Graphs show

$2^{-ddCt}$  (mean  $\pm$  SD,  $n = 5$ ). Asterisks indicate statistical significance ( $p < 0.05$ , Kruskal-Wallis test). Fold change of IL-6, IL-8, COX-2, MMP-1 and MMP-3 is shown in log scale.

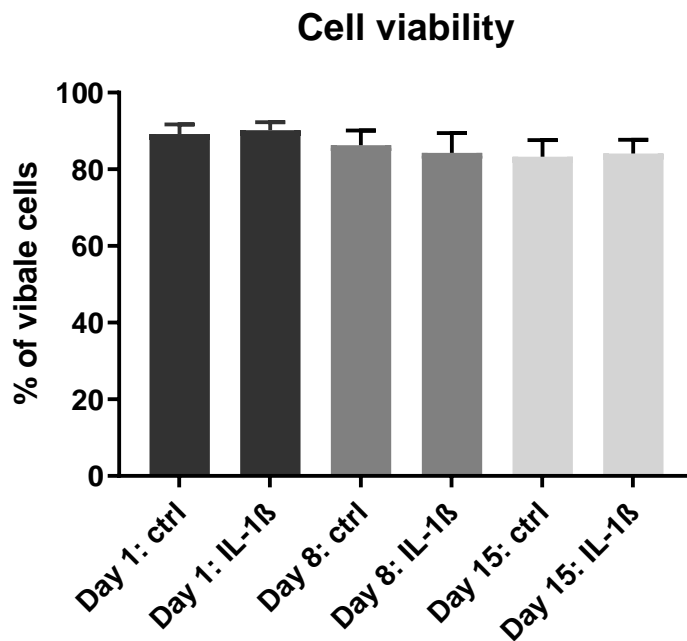

**Supplementary figure S2.** Cell viability of IVD cells cultured in 3D alginate beads for 15 days. Graph shows % of viable cells (mean  $\pm$  SD,  $n = 5$ ). Asterisks indicate statistical significance ( $p < 0.05$ , Kruskal-Wallis test).

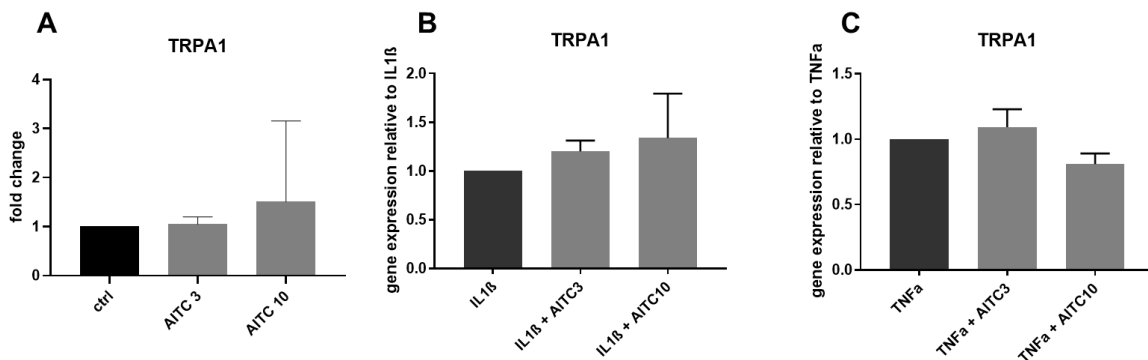

**Supplementary figure S3.** Gene expression of TRPA1 in IVD cells treated with IL-1 $\beta$  and TNF- $\alpha$  with and (A) without with TRPA1 agonist allyl isothiocyanate (AITC, 3 and 10  $\mu$ M)  $\pm$  (B) 10 ng/mL IL-1 $\beta$  or (C) TNF- $\alpha$ . Graphs show gene expression as fold change and calculated relative to IL-1 $\beta$  or TNF- $\alpha$  treatment (mean  $\pm$  SD,  $n = 3$ ). Asterisks indicate statistical significance ( $p < 0.05$ , Kruskal-Wallis test)
